# Supplementary material for: Combining method validation data with additional information for measurement uncertainty evaluation – determination of melatonin content in tea
Source: Royal Society of Chemistry journal article supplement (doi:10.1039/d4ay01468e), 2024-01-01
Supplement: d4ay01468e1.xlsx [file d4ay01468e1.xlsx]

## Sheet: 1-Uncontr_Temp_Vol
	Uncontrolled temperature of extraction volumes
	T (°C)	ρ1 (g mL-1)
	60	0.9832	0.00205321	0.00290368
	70	0.97776	0.00204185	0.00288762
	80	0.97179	0.00202939	0.00286999
	90	0.96531	0.00201585	0.00285085
	100	0.95835	0.00200132	0.00283029
		Min	0.00200132	0.00283029
		Max	0.00205321	0.00290368
	Val. 2024/04/10

## Sheet: 2-Mass_of_Analytical_Portion
	Evaluation of the uncertainty of the mass of the analytical portion
	Type of weighing:	weighing by difference
	Analytical portion mass (mg) *:	2.5
	Repeatability standard deviation (mg):	0.015
	Balance bias observed from the calibration (mg):	0.06
	* - from sheet: "6-Recovery"
	Standard uncertainty of the mass, u(m) (mg):	0.0533854
	Relative standard uncertainty of the mass, u'(m):	0.0213542
	Val. 2024/04/10

## Sheet: 3-Calibrators_Values
	Evaluation of the uncertainty of calibrators values
		Value	u	Units	u'
	Pure melatonin mass	2	0.0533854	mg	0.0266927
	Purity of the reference substance	0.98	0.011547	-	0.0117827
	V1	100	0.0779689	mL (with temperature effect)	0.000779689
	V2	10	0.130128	µL (without temperature effect)	0.0130128
	V3	10	0.0205303	mL (without temperature effect)	0.00205303
				u'_comb	0.0320232
	Val. 2024/04/10

## Sheet: 4-HPLC_Sensitivity_Variation
	Evaluation of the uncertainty of calibrators values
																				Daily curve and specific sample signal*
																	s_a	17610.2		a	-30589.7		c_s	90.7618
	Max	235															s_b	319.808		b	5103.55
	Min	20.8																		y_s	432618
									y^ - Area predicted by the curve											* - from sheet: "6-Recovery"
	Calibration 1								Calibration 1						Start	End	SUMSQ	Count	SQRT(SUMSQ/(n-2))			Term 1	Term 2	Term 3	Term 4		s_c_S	s'_c_S
	c (µg L-1)	Area, y	a (intercept)	b (slope)	r (correl)		r_ab		c	y^	(y-y^)/y	((y-y^)/y)^2		1	20.8	44.6	0.068934	10	0.0928264			61.9166	11.9065	32.3474	-28.0368		-	-
	23.5	103142	-30589.7	5103.55	0.999117		-0.71431		23.5	89343.8	0.133775	0.0178957		2	44.6	68.4	0.0119535	6	0.054666			21.4733	11.9065	32.3474	-28.0368		-	-
	47	216792							47	209277	0.0346656	0.0012017		3	68.4	92.2	0.00633012	6	0.039781			11.3715	11.9065	32.3474	-28.0368		5.25248	0.057871
	70.5	337709							70.5	329211	0.0251645	0.00063325		4	92.2	116	0.00434677	6	0.032965			7.80855	11.9065	32.3474	-28.0368		-	-
	94	432618							94	449144	-0.0382007	0.00145929		5	116	139.8	0.00591843	6	0.0384657			10.6319	11.9065	32.3474	-28.0368		-	-
	117.5	562659							117.5	569078	-0.0114078	0.000130138		6	139.8	163.6	0.00717842	6	0.0423628			12.8953	11.9065	32.3474	-28.0368		-	-
	141	654114							141	689011	-0.053351	0.00284633		7	163.6	187.4	0.0034923	8	0.0241257			4.18238	11.9065	32.3474	-28.0368		-	-
	164.5	810181							164.5	808945	0.00152594	2.3285e-06		8	187.4	211.2	0.0031499	6	0.028062			5.65849	11.9065	32.3474	-28.0368		-	-
	188	936443							188	928878	0.00807865	6.52646e-05		9	211.2	235	0.00219186	6	0.0234087			3.93747	11.9065	32.3474	-28.0368		-	-
	211.5	1.05702e+06							211.5	1.04881e+06	0.00777009	6.03743e-05														FINAL	5.25248	0.057871
	235	1.17976e+06							235	1.16875e+06	0.00933809	8.71999e-05
	Calibration 2								Calibration 2
	c (µg L-1)	Area, y	a (intercept)	b (slope)	r (correl)				c	y^	(y-y^)/y	((y-y^)/y)^2		Instrumental response linearity
	23.5	126130	7763.76	4901.37	0.997395				23.5	122946	0.0252475	0.000637434
	47	259603							47	238128	0.0827228	0.00684307
	70.5	339941							70.5	353310	-0.0393274	0.00154664
	94	461533							94	468493	-0.01508	0.000227407
	117.5	552840							117.5	583675	-0.0557762	0.00311099
	141	689698							141	698857	-0.0132801	0.000176361
	164.5	846405							164.5	814039	0.0382393	0.00146225
	188	963866							188	929222	0.0359432	0.00129191
	211.5	1.00371e+06							211.5	1.0444e+06	-0.0405414	0.00164361
	235	1.16893e+06							235	1.15959e+06	0.00799482	6.39172e-05
	Calibration 3								Calibration 3
	c (µg L-1)	Area, y	a (intercept)	b (slope)	r (correl)				c	y^	(y-y^)/y	((y-y^)/y)^2
	20.8	97066	483.776	4313.94	0.999254				20.8	90213.7	0.0705947	0.00498361
	41.6	186967							41.6	179944	0.0375677	0.00141134
	62.4	262480							62.4	269673	-0.0274052	0.000751044
	83.2	345236							83.2	359403	-0.041038	0.00168412
	104	458282							104	449133	0.0199629	0.000398516
	124.8	530827							124.8	538863	-0.0151385	0.000229173
	145.6	639463							145.6	628593	0.0169983	0.000288941
	166.4	701118							166.4	718323	-0.0245391	0.000602168
	187.2	813751							187.2	808053	0.00700215	4.90301e-05
	208	904792							208	897783	0.00774667	6.00109e-05
	Calibration 4								Calibration 4
	c (µg L-1)	Area, y	a (intercept)	b (slope)	r (correl)				c	y^	(y-y^)/y	((y-y^)/y)^2
	20.8	128971	22644.2	4352.95	0.998224				20.8	113186	0.122392	0.0149799
	41.6	199743							41.6	203727	-0.0199452	0.000397809
	62.4	279987							62.4	294269	-0.0510066	0.00260167
	83.2	369796							83.2	384810	-0.0405996	0.00164833
	104	462131							104	475352	-0.0286076	0.000818393
	124.8	577361							124.8	565893	0.0198635	0.00039456
	145.6	687123							145.6	656434	0.044663	0.00199478
	166.4	759131							166.4	746976	0.0160121	0.000256386
	187.2	821224							187.2	837517	-0.0198397	0.000393614
	208	920753							208	928059	-0.00793443	6.29553e-05
	Calibration 5								Calibration 5
	c (µg L-1)	Area, y	a (intercept)	b (slope)	r (correl)				c	y^	(y-y^)/y	((y-y^)/y)^2
	22.1	120959	4793.39	4481.76	0.998004				22.1	103840	0.141526	0.0200297
	44.2	191381							44.2	202887	-0.060122	0.00361466
	66.3	295694							66.3	301934	-0.0211027	0.000445325
	88.4	394355							88.4	400981	-0.0168032	0.000282347
	110.5	494174							110.5	500028	-0.0118466	0.000140341
	132.6	588441							132.6	599075	-0.0180712	0.000326569
	154.7	728039							154.7	698122	0.0410931	0.00168864
	176.8	816422							176.8	797169	0.0235824	0.00055613
	198.9	861181							198.9	896216	-0.0406817	0.001655
	221	1.00487e+06							221	995262	0.00955897	9.1374e-05
	Calibration 6								Calibration 6
	c (µg L-1)	Area, y	a (intercept)	b (slope)	r (correl)				c	y^	(y-y^)/y	((y-y^)/y)^2
	22.1	95258.1	-4326.23	4764.29	0.999036				22.1	100965	-0.0599049	0.0035886
	44.2	214258							44.2	206255	0.037353	0.00139525
	66.3	308302							66.3	311546	-0.010521	0.00011069
	88.4	407410							88.4	416837	-0.0231394	0.000535434
	110.5	503938							110.5	522128	-0.0360946	0.00130282
	132.6	654623							132.6	627418	0.0415572	0.001727
	154.7	742767							154.7	732709	0.013541	0.00018336
	176.8	849083							176.8	838000	0.0130534	0.000170391
	198.9	939681							198.9	943291	-0.00384106	1.47537e-05
	221	1.03241e+06							221	1.04858e+06	-0.015665	0.000245392
	Val. 2024/04/10

## Sheet: 5-Precision
	Evaluation of precision uncertainty
	Precision estimated under intermediate precision conditions
	LOQ (µg L-1):	20.88	(only instrumental quantification)						LOQ (mg kg-1):	6065.65	(complete process)
	2*LOQ (µg L-1) (42 µg L-1):	Day 01		Day 02		Day 03		Day 04		Day 05		Day 06		Day 07		Day 08		Day 09		Day 10
		Rep.1	Rep.2	Rep.1	Rep.2	Rep.1	Rep.2	Rep.1	Rep.2	Rep.1	Rep.2	Rep.1	Rep.2	Rep.1	Rep.2	Rep.1	Rep.2	Rep.1	Rep.2	Rep.1	Rep.2
		4083	3946	4783	6559	3607	3832	3917	3790	4018	4147	4219	4238	4129	4251	4107	4196	4173	4129	4352	4124
	sr (mg kg-1):	96.8736		1255.82		159.099		89.8026		91.2168		13.435		86.267		62.9325		31.1127		161.22
	d.f.	1		1		1		1		1		1		1		1		1		1
	sr 2*(n-1)	9384.5		1.57709e+06		25312.5		8064.5		8320.5		180.5		7442		3960.5		968		25992
		Intermediate precision:					Repeatability:
			sI (mg/kg)	d.f. (m-1)	sI2*(n-1)			sr (mg/kg)	d.f.
		Estimate 1	301.638	9	818870		Pooling, sr<I>	408.254	10
		Estimate 2	803.03	9	5.80371e+06		Pooling, s'r<II>	0.0965139
		Pooling, sI<I>	606.565	18
		Pooling, s'I<II>	0.143396				Mean	4230	mg/kg
	10*LOQ (µg L-1) (209 µg L-1):	Day 01		Day 02		Day 03		Day 04		Day 05		Day 06		Day 07		Day 08		Day 09		Day 10
		Rep.1	Rep.2	Rep.1	Rep.2	Rep.1	Rep.2	Rep.1	Rep.2	Rep.1	Rep.2	Rep.1	Rep.2	Rep.1	Rep.2	Rep.1	Rep.2	Rep.1	Rep.2	Rep.1	Rep.2
		20134	19879	19073	18793	19020	19540	18203	18089	18891	20198	20257	20101	20662	19568	19812	19947	20403	19916	19516	19973
	sr (mg kg-1):	180.312		197.99		367.696		80.6102		924.189		110.309		773.575		95.4594		344.361		323.148
	d.f.	1		1		1		1		1		1		1		1		1		1
	sr 2*(n-1)	32512.5		39200		135200		6498		854124		12168		598418		9112.5		118584		104424
		Intermediate precision:					Repeatability:
			sI (mg kg-1)	d.f. (m-1)	sI2*(n-1)			sr (mg kg-1)	d.f.
		Estimate 1	789.5	9	5.60979e+06		Pooling, sr	437.063	10
		Estimate 2	665.401	9	3.98483e+06		Pooling, s'r<III>	0.0223006
		Pooling, sI	730.092	18
		Pooling, s'I<III>	0.037252				Mean	19598.8	mg kg-1
			Mass fraction (mg kg-1)		Pooling, sr<I>	Pooling, sI<I>
			Initial	Final	(mg kg-1)	(mg kg-1)	Pooling, s'r<II>	Pooling, s'I<II>	Pooling, s'r<III>	Pooling, s'I<III>
		Interval I	2115	4230	408.254	606.565
		Interval II	4230	19598.8	-	-	0.0965139	0.143396
		Interval III	19598.8	(…)	-	-	-	-	0.0223006	0.037252
	Val. 2024/04/10

## Sheet: 6-Recovery
	Evaluation of precision uncertainty
	Spiking procedure:
	Description				---> 0.5 mL, V2, to tea portion
	m (2 mg)/ 100 mL of water, V1 --->								Normal procedure where m_s is the tea sample mass (2.5 mg without uncertainty since spiking was performed after taking the analytical portion)
	Purity melatonin, P - 98%				---> 2.5 mL, V3, to tea portion
								Value	u	units	u'	Contribut.
	w_sp(1):	- spiked mass fraction ((m*P/V1)*V2/m_s					m	2	0.0533854	mg	0.0266927	0.737822	w_sp(1):	3920	(mg kg-1)
							P	0.98	0.011547	-	0.0117827	0.143765
							V1	100	0.0779689	mL	0.000779689	0.000629519	u'(w_sp(1)):	0.0310754
							V2	0.5	0.00533248	mL	0.010665	0.117784
							m_s	2.5	0	mg	0	0
											SUM	1
								Value	u	units	u'	Contribut.
	w_sp(2):	- spiked mass fraction ((m*P/V1)*V3/m_s					m	2	0.0533854	mg	0.0266927	0.770529	w_sp(2):	19600	(mg kg-1)
							P	0.98	0.011547	-	0.0117827	0.150138
							V1	100	0.0779689	mL	0.000779689	0.000657425	u'(w_sp(2)):	0.0304087
							V3	2.5	0.0213235	mL	0.00852941	0.0786759
							m_s	2.5	0	mg	0	0
											SUM	1
	Day 01		Day 02		Day 03		Day 04		Day 05		Day 06		Day 07		Day 08		Day 09		Day 10
	Rep.1	Rep.2	Rep.1	Rep.2	Rep.1	Rep.2	Rep.1	Rep.2	Rep.1	Rep.2	Rep.1	Rep.2	Rep.1	Rep.2	Rep.1	Rep.2	Rep.1	Rep.2	Rep.1	Rep.2
	4083	3946	4783	6559	3607	3832	3917	3790	4018	4147	4219	4238	4129	4251	4107	4196	4173	4129	4352	4124	Mean	SD	n		Mean rec.		term
	4014.5		5671		3719.5		3853.5		4082.5		4228.5		4190		4151.5		4151		4238		4230	533.449	10		1.07908		0.00297634
	Day 01		Day 02		Day 03		Day 04		Day 05		Day 06		Day 07		Day 08		Day 09		Day 10
	Rep.1	Rep.2	Rep.1	Rep.2	Rep.1	Rep.2	Rep.1	Rep.2	Rep.1	Rep.2	Rep.1	Rep.2	Rep.1	Rep.2	Rep.1	Rep.2	Rep.1	Rep.2	Rep.1	Rep.2
	20134	19879	19073	18793	19020	19540	18203	18089	18891	20198	20257	20101	20662	19568	19812	19947	20403	19916	19516	19973	Mean	SD	n		Mean rec.		term
	20006.5		18933		19280		18146		19544.5		20179		20115		19879.5		20159.5		19744.5		19598.8	653.386	10		0.999936		0.0010357
																								overall mean:	1.03951
																								uRec	0.0316703
																								t-test	1.24751	< 2
																								u'Rec	0.0316703
	Val. 2024/04/10

## Sheet: 7-Comb&Expansion
	Combination and expansion of the uncertainty
	Daily data:
	m (mg)	2.5	(tea sample mass)			Uncertainty components
						Precision uncertainty													EXPANDED UNCERTAINTY
	a (intercept)	-30589.7				Mass fraction (g kg-1)
	b (slope)	5103.55				Initial	Final
	y_s (mean)	432618				2.115	4.23	sr<I> (g kg-1)	0.408254	sI<I> (g kg-1)	0.606565
						4.23	19.5987	s'r<II>	0.0965139	s'I<II>	0.143396
	c_s (µg L-1)	90.7618				19.5987	195.987	s'r<III>	0.0223006	s'I<III>	0.037252
	Within day replicates	1					s'r	s'I	Comb.
						s'I (final)	0.0965139	0.143396	0.143396
	w (g kg-1)	9.07618
	u'w	0.162468				u'm	0.0213542
	U'w (k = 2, c.l. 95%)	0.324937				u'c	0.0320232
	Uw (k = 2, c.l. 95%)	2.94918				u'c_s	0.057871
						u'R	0.0316703
	Val. 2024/04/10
